# Supplementary material for: Transcriptome-Wide Identification and Prediction of miRNAs and Their Targets in Paris polyphylla var. yunnanensis by High-Throughput Sequencing Analysis
Source: MDPI journal article supplement (doi:10.3390/ijms18010219), 2017-01-22
Supplement: s1 [file s1]

# Supplementary Materials: Transcriptome-Wide Identification and Prediction of miRNAs and Their Targets in *Paris polyphylla* var. *yunnanensis* by High-Throughput Sequencing Analysis

Li-Zhen Ling, Shu-Dong Zhang, Fan Zhao, Jin-Long Yang, Wen-Hui Song, Shen-Min Guan, Xin-Shu Li, Zhuang-Jia Huang, and Le Cheng

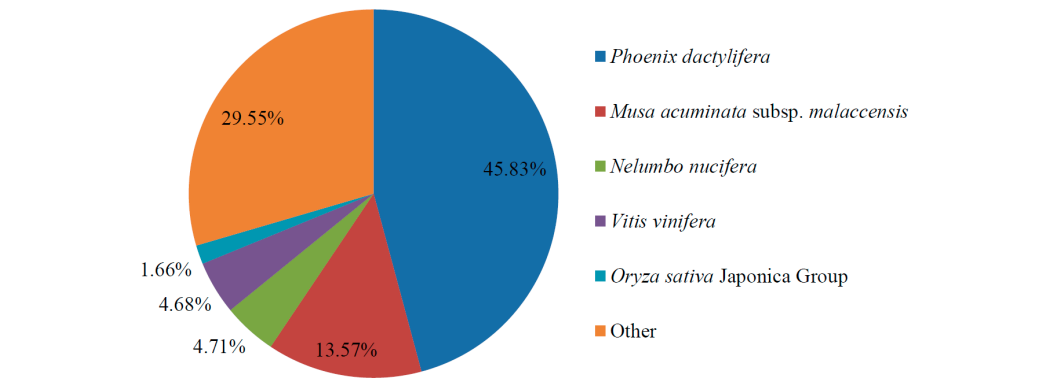

Figure S1. Species distribution of unigenes matching the top five species using Blastx in the Nr database.

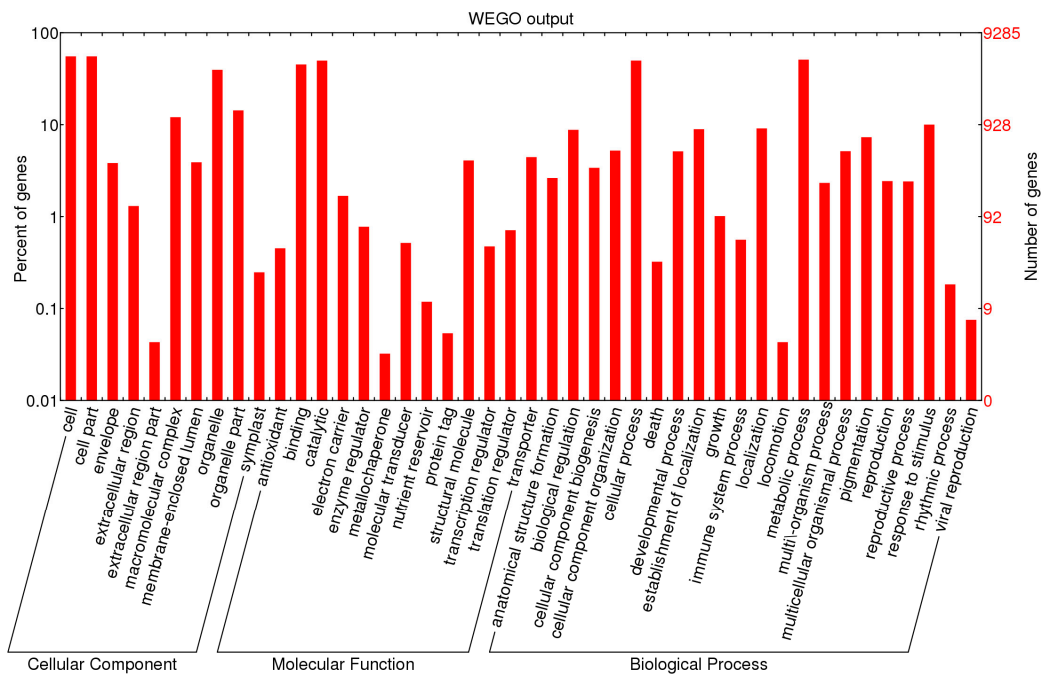

Figure S2. Gene Ontology (GO) categories assigned to all unigenes.

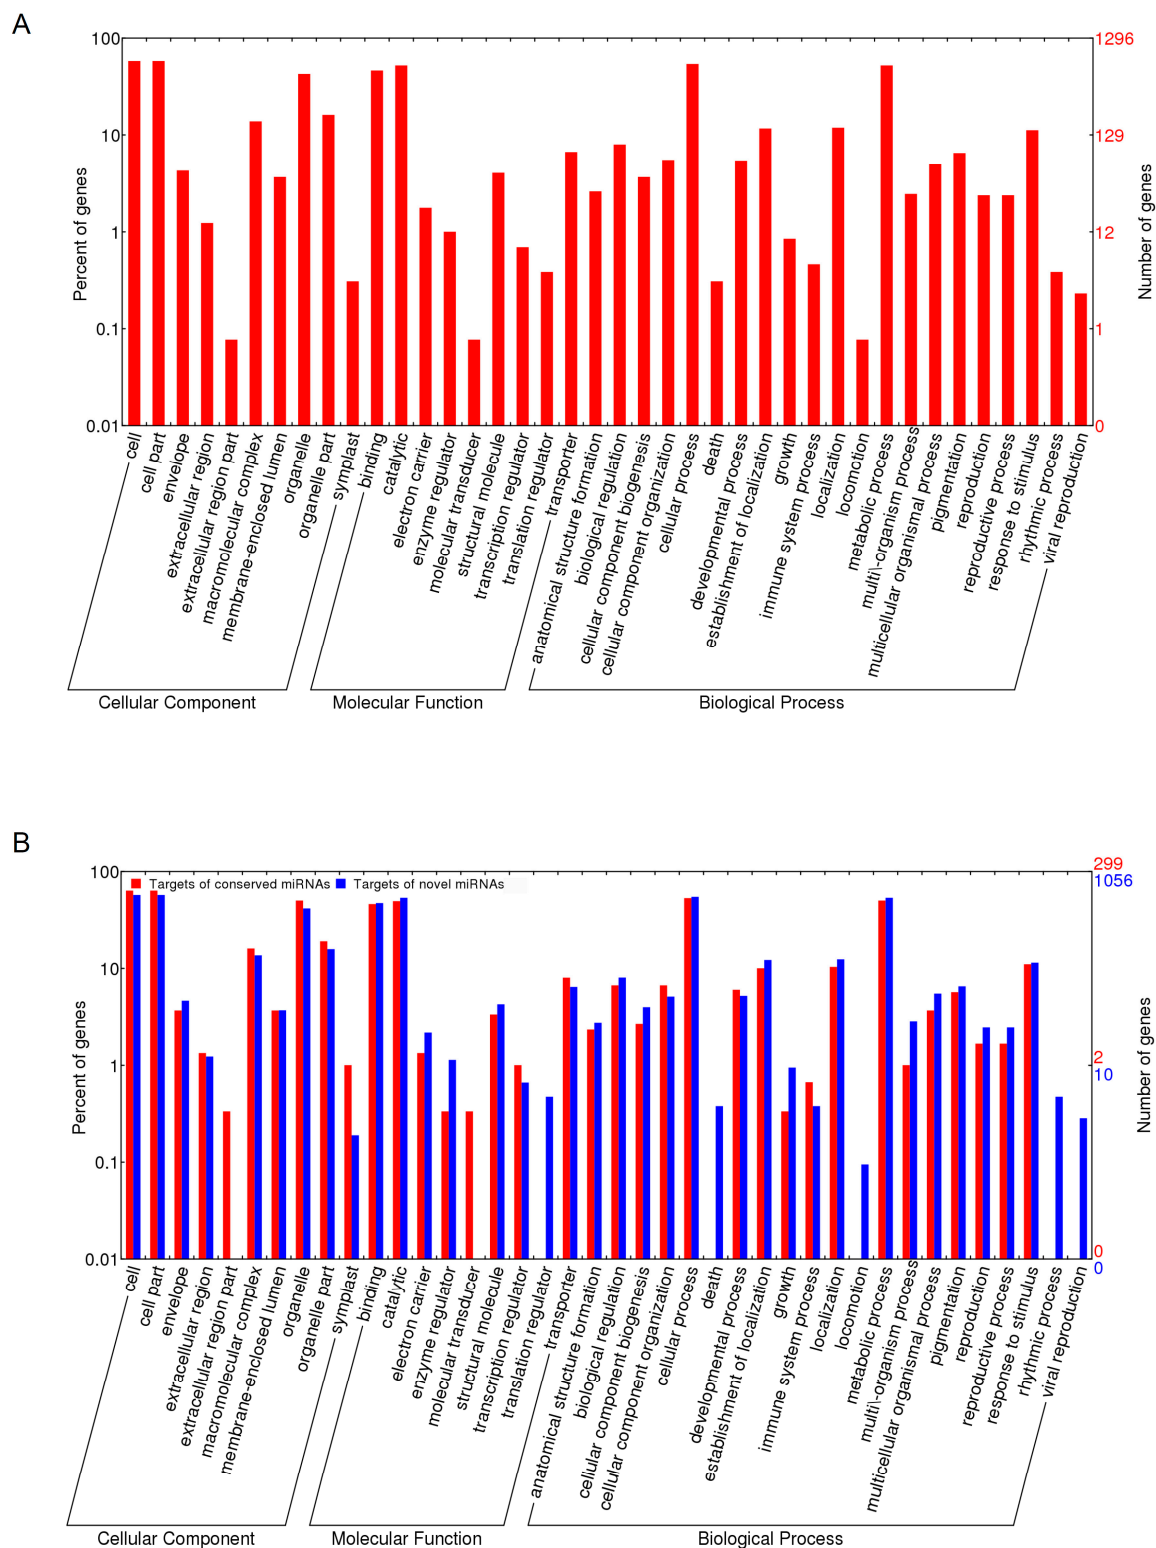

**Figure S3.** GO categories assigned to all targets (A); and the targets of conserved and novel miRNAs (B).

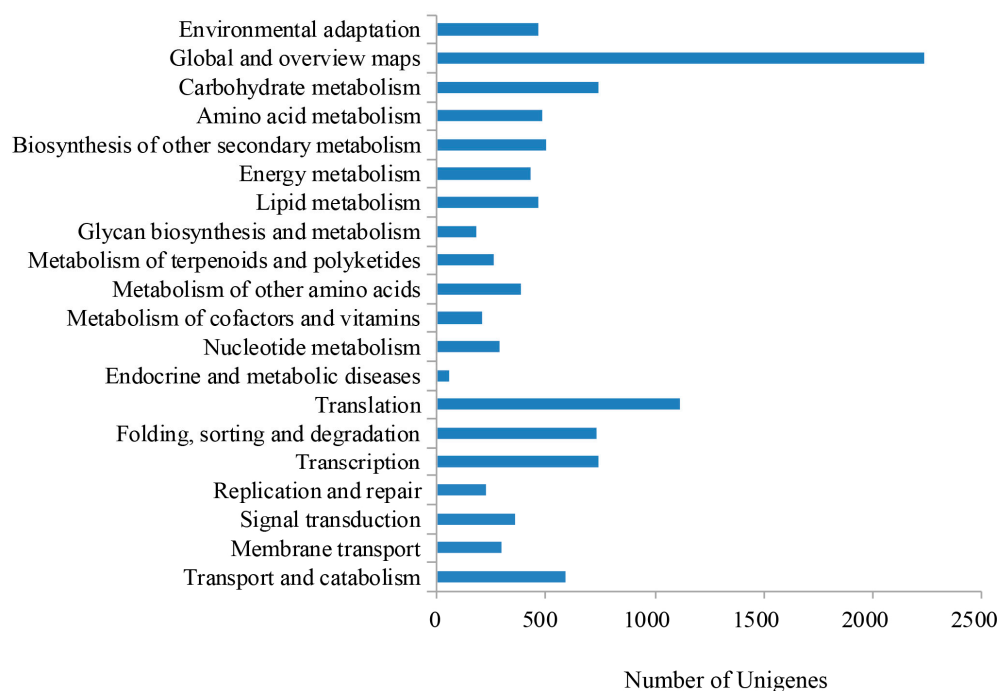

**Figure S4.** Kyoto Encyclopedia of Genes and Genomes (KEGG) pathway annotation of all targets.

**Table S1.** Detailed information on each sequenced and assembled transcriptome library in seed and seed coats.

| Sequences              | Samples     |             |             |        |        |        |
|------------------------|-------------|-------------|-------------|--------|--------|--------|
|                        | Seed Coat-1 | Seed Coat-2 | Seed Coat-3 | Seed-1 | Seed-2 | Seed-3 |
| Reads                  |             |             |             |        |        |        |
| Total Raw Reads (MB)   | 63.33       | 63.33       | 63.33       | 63.33  | 63.33  | 63.33  |
| Total Clean Reads (MB) | 59.61       | 58.93       | 59.72       | 59.09  | 58.98  | 60.26  |
| Total Clean Bases (GB) | 8.94        | 8.84        | 8.96        | 8.86   | 8.85   | 9.04   |
| Clean Reads Q20 (%)    | 97.4        | 97.15       | 97.08       | 97.54  | 97.2   | 97.54  |
| Unigenes               |             |             |             |        |        |        |
| Number                 | 83,715      | 79,682      | 87,539      | 38,115 | 39,261 | 36,138 |
| Mean Length            | 673         | 675         | 655         | 790    | 776    | 770    |

**Table S2.** Statistics of high-through sequencing and assembling results of each *P. polyphylla* var. *yunnanensis* small RNA library.

| Sequences               | Samples     |             |            |            |
|-------------------------|-------------|-------------|------------|------------|
|                         | Seed Coat-1 | Seed Coat-2 | Seed-1     | Seed-2     |
| Raw reads               | 12,561,372  | 13,529,604  | 12,689,441 | 12,614,541 |
| High quality            | 12,525,800  | 13,487,899  | 12,640,627 | 12,572,784 |
| 3' Adaptor null         | 48,263      | 43,450      | 46,933     | 37,341     |
| Insert null             | 2471        | 2394        | 783        | 432        |
| 5' Adaptor contaminants | 17,365      | 10,309      | 6771       | 5497       |
| Smaller than 18 nt      | 915,201     | 85,717      | 207,993    | 44,506     |
| Clean reads             | 11,542,355  | 13,345,793  | 12,377,969 | 12,484,680 |
| Conserved miRNAs        | 140         | 158         | 81         | 134        |
| Novel miRNAs            | 489         | 413         | 299        | 341        |

**Table S3.** Statistics of annotated small RNA data of two replicate libraries in seed and seed coat of *P. polyphylla* var. *yunnanensis*.

| Category    | Unique sRNAs % |             |        |        |
|-------------|----------------|-------------|--------|--------|
|             | Seed Coat-1    | Seed Coat-2 | Seed-1 | Seed-1 |
| rRNA        | 0              | 0.09        | 12.76  | 8.08   |
| snoRNA      | 0              | 0           | 0.04   | 0.07   |
| tRNA        | 0              | 0.02        | 3.21   | 5.10   |
| snRNA       | 0              | 0.01        | 0.22   | 0.17   |
| miRNA       | 2.69           | 1.57        | 1.83   | 1.07   |
| unannotated | 97.31          | 98.31       | 81.94  | 85.50  |
